# Supplementary material for: A systematic review on the biochemical threshold of mitochondrial genetic variants
Source: HighWire-hosted journal article supplement (doi:10.1101/gr.278200.123), 2024-04-16
Supplement: Supplemental_Table_S1_2024.03.13.docx [file Supplemental_Table_S1_2024.03.13.docx]

**Supplemental Materials for:** A systematic review on the biochemical threshold of mitochondrial genetic variants

Karan K. Smith,1 Jesse D. Moreira,1,2 Callum R. Wilson,1 June O. Padera,1 Ashlee N. Lamason1, Liying Xue,1 Deepa M. Gopal,1 David B. Flynn,3 Jessica L. Fetterman1*

1Evans Department of Medicine and Whitaker Cardiovascular ­­­Institute, Boston University Chobanian and Avedisian School of Medicine, Boston, MA 02118, U.S.

2Programs in Human Physiology, Department of Health Sciences, Boston University Sargent College, Boston, MA, 02215, U.S.

3Medical Sciences and Education, Boston University Chobanian and Avedisian School of Medicine, Boston, MA 02118, U.S.

*Correspondence:

Jessica L. Fetterman

Email: [jefetter@bu.edu](mailto:jefetter@bu.edu)

**Table of Contents:**

**Supplemental Table 1.** Pathogenic Classification and Reported Allele frequency (pages 2-4)

**Supplemental Table 1.** Pathogenic Classification and Reported Allele Frequency

| **Variant** | **Classified as a Confirmed Pathogenic Variant** | | **Allele Frequency, %** | | |
| --- | --- | --- | --- | --- | --- |
| **MSeqDR (Shen et al., 2018)** | **MitoMap**  **(Lott et al., 2013)** | **GnomAD Homoplasmic**  **(Chen et al., 2022)** | **GnomadAD Heteroplasmic (Chen et al., 2022)** | **MitoMap**  **(Lott et al., 2013)** |
| **Complex I** | | | | | |
| 3365T>C |  |  | 0 | 0 |  |
| 3376G>A | X |  |  |  |  |
| 3380G>A |  |  | 0 | 0 |  |
| 3481G>A | X |  | 0 | 0 |  |
| 3571insC |  |  |  |  |  |
| 3634A>G |  |  | 0 | 0 |  |
| 3697G>A | X |  | 0 | 0 |  |
| 3796A>G | X |  | 8.3E-03 | 1.2E-04 |  |
| 3946G>A | X |  | 0 | 0 |  |
| 3949T>C | X |  |  |  |  |
| 4175G>A |  |  |  |  |  |
| 10134C>A | X |  |  |  |  |
| 3460G>A | X | X | 0 | 1.8E-05 | 5.1E-02 |
| 12338T>C | X |  | 1.2E-03 | 3.5E-05 |  |
| 12706T>C | X |  |  |  |  |
| 13042G>A | X |  | 0 | 0 |  |
| 13045A>G |  |  |  |  |  |
| 13063G>A |  |  | 1.8E-05 | 7.1E-05 |  |
| 13376T>C |  |  | 7.1E-05 | 5.3E-05 |  |
| 14487T>C | X | X | 0 | 0 | 0 |
| 14453G>A | X |  | 0 | 0 |  |
| 14459G>A | X | X | 0 | 1.8E-05 | 5.0E-03 |
| 13513G>A | X | X | 0 | 0 | 2.0E-03 |
| 14577T>C |  |  | 8.9E-04 | 3.5E-05 |  |
| 14600G>A |  |  | 0 | 1.8E-05 |  |
| 11778G>A | X | X | 1.9E-04 | 2.3E-04 | 3.1E-01 |
| 10197G>A | X | X | 0 | 0 | 7.0E-03 |
| 10191T>C | X | X | 0 | 0 | 0 |
| 10158T>C | X | X |  |  | 0 |
| **Complex III** | | | | | |
| 14864T>C |  |  | 0 | 0 |  |
| 15150G>A | X |  | 0 | 0 |  |
| 15170G>A |  |  | 0 | 0 |  |
| 15197T>C | X |  | 0 | 0 |  |
| 15243G>A |  |  | 0 | 0 |  |
| 15498G>A | X |  | 2.8E-04 | 1.2E-04 |  |
| 15579A>G | X |  | 0 | 0 |  |
| 15699G>C |  |  |  |  |  |
| 15635T>C |  |  | 0 | 0 |  |
| 15800C>T |  |  |  |  |  |
| **Complex IV** | | | | | |
| 6489C>A | X |  | 3.3E-03 | 0 |  |
| 6708G>A |  |  | 0 | 0 |  |
| 6930G>A | X |  | 0 | 0 |  |
| 6955G>A |  |  | 0 | 0 |  |
| 7444G>A | X |  | 5.4E-03 | 1.8E-04 |  |
| 7587T>C | X |  | 0 | 0 |  |
| 7671T>A | X |  |  |  |  |
| 7896G>A | X |  | 0 | 0 |  |
| 7970G>T |  |  |  |  |  |
| 9396G>A |  |  |  |  |  |
| 9553G>A |  |  |  |  |  |
| 9559delC |  |  |  |  |  |
| 9789T>C |  |  | 0 | 0 |  |
| 9952G>A | X |  |  |  |  |
| 9957T>C |  |  | 2.8E-04 | 0 |  |
| 9379G>A |  |  | 0 | 0 |  |
| **Complex V** | | | | | |
| 9185T>C | X | X | 0 | 3.5E-05 | 5.0E-03 |
| 9176T>C | X | X | 0 | 5.3E-05 | 5.0E-03 |
| 8993T>G | X | X | 0 | 0 | 1.0E-02 |
| 8993T>C | X | X | 1.8E-05 | 1.8E-05 | 3.0E-03 |
| 8529G>A | X |  |  |  |  |
| m.9127-9128 del AT |  |  |  |  |  |
| 9176T>G | X |  |  |  |  |

Variants with no pathogenicity confirmation or reported allele frequencies are left blank. The absence of the variant in the population is indicated by a 0% allele frequency.

**References**

Chen, S., Francioli, L. C., Goodrich, J. K., Collins, R. L., Wang, Q., Alföldi, J., Watts, N. A., Vittal, C., Gauthier, L. D., Poterba, T., Wilson, M. W., Tarasova, Y., Phu, W., Yohannes, M. T., Koenig, Z., Farjoun, Y., Banks, E., Donnelly, S., Gabriel, S., . . . Karczewski, K. J. (2022). A genome-wide mutational constraint map quantified from variation in 76,156 human genomes. *bioRxiv*, 2022.2003.2020.485034. <https://doi.org/10.1101/2022.03.20.485034>

Lott, M. T., Leipzig, J. N., Derbeneva, O., Xie, H. M., Chalkia, D., Sarmady, M., Procaccio, V., & Wallace, D. C. (2013). mtDNA Variation and Analysis Using Mitomap and Mitomaster. *Curr Protoc Bioinformatics*, *44*(123), 1 23 21-26. <https://doi.org/10.1002/0471250953.bi0123s44>

Shen, L., Attimonelli, M., Bai, R., Lott, M. T., Wallace, D. C., Falk, M. J., & Gai, X. (2018). MSeqDR mvTool: A mitochondrial DNA Web and API resource for comprehensive variant annotation, universal nomenclature collation, and reference genome conversion. *Hum Mutat*, *39*(6), 806-810. <https://doi.org/10.1002/humu.23422>
